# Supplementary material for: LRSK: a low-rank self-representation K -means method for clustering single-cell RNA-sequencing data
Source: Royal Society of Chemistry journal article supplement (doi:10.1039/d0mo00034e), 2020-06-09
Supplement: d0mo00034e1.pdf [file d0mo00034e1.pdf]

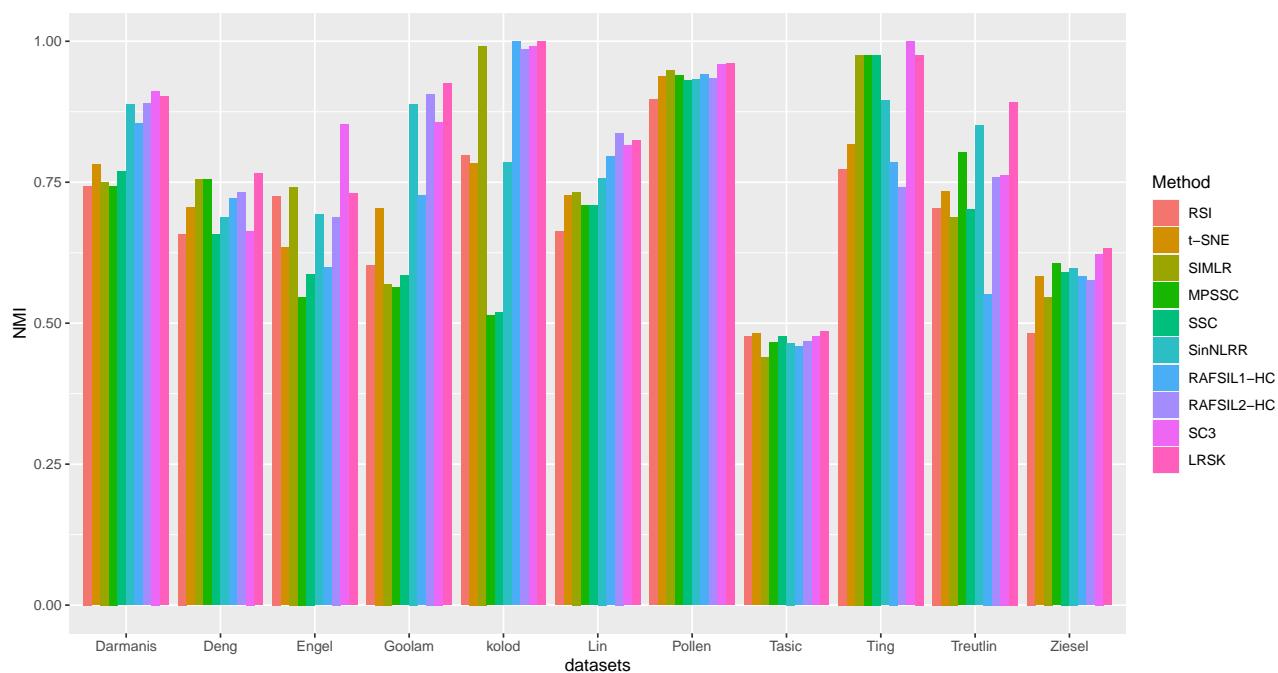

Figure 1: Comparison results of ten methods based on evaluation standard NMI under eleven simple cell RNA-sequencing data

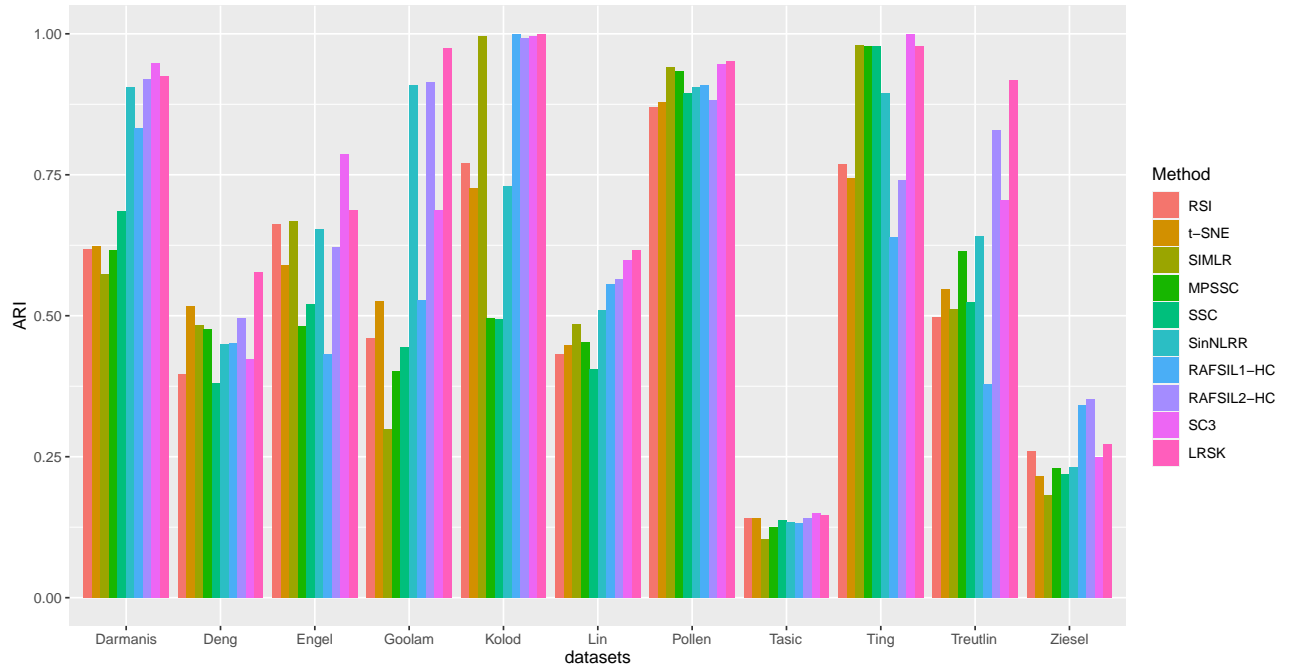

Figure 2: Comparison results of ten methods based on evaluation standard ARI under eleven simple cell RNA-sequencing data

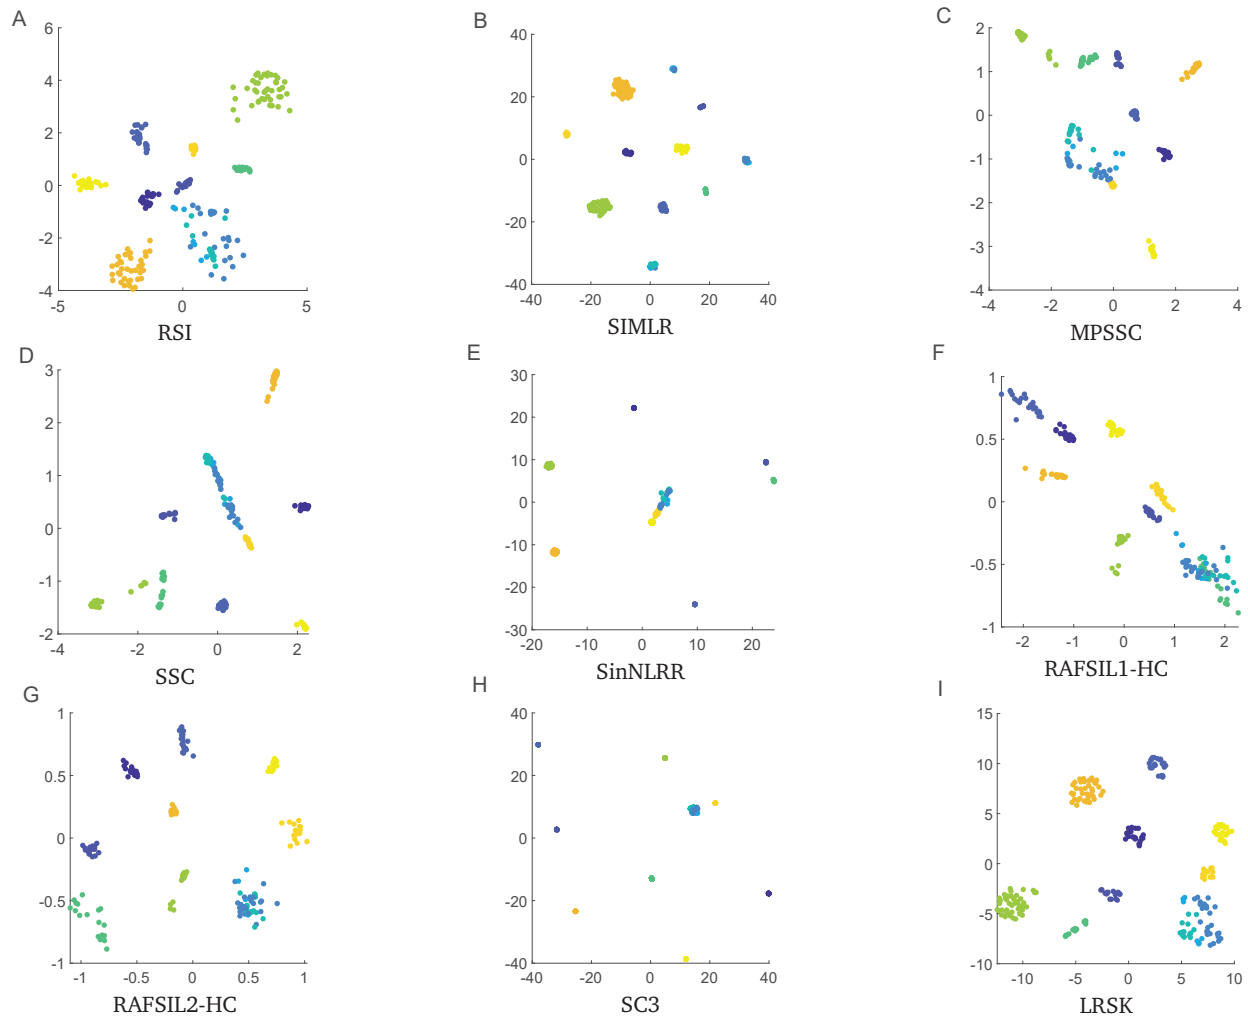

Figure 3: Visualization comparison of cells with the clusters located in low-dimensional space on case data Pollen. The graphs(A-I) of data points show the clustering performance of putting similar cell populations together for RSI, SIMLR, MPSSC, SSC, SinNLRR, RAFSIL1-HC, RAFSIL2-HC, SC3 and LRSK through improved t-SNE, where each point represents a cell and eleven distinct colors represent eleven different cell types.

Table 1: Comparison of the NMI, Purity and ARI achieved by LRSK and other clustering methods on a large scRNA-seq dataset of human livers

|        | RSI    | t-SNE  | SIMLR  | MPSSC  | SSC    | RAFSIL1-HC | SC3    | LRSK          |
|--------|--------|--------|--------|--------|--------|------------|--------|---------------|
| NMI    | 0.7196 | 0.8010 | 0.7366 | 0.7122 | 0.7197 | 0.7184     | 0.7964 | <b>0.8310</b> |
| Purity | 0.7557 | 0.8202 | 0.7266 | 0.7425 | 0.7536 | 0.4516     | 0.7231 | <b>0.8611</b> |
| ARI    | 0.5314 | 0.6348 | 0.5768 | 0.5380 | 0.5368 | 0.3618     | 0.6095 | <b>0.7229</b> |

<sup>a</sup>Normalized Mutual Information (NMI) (Strehl and Ghosh, 2003), Purity (Wagner and Wagner, 2007a), and Adjusted Rand Index (ARI) (Wagner and Wagner, 2007b).



## References

- [1] Strehl, A. and Ghosh, J. (2003). Cluster ensembles a knowledge reuse framework for combining multiple partitions. *Journal of Machine Learning Research*, 3, 583 – 617.
- [2] Wagner, S. and Wagner, D. (2007a). Comparing clusterings- an overview. *Universit at Karlsruhe, Technical Report*.
- [3] Wagner, S. and Wagner, D. (2007b). Comparing clusterings: an overview. *Universit at Karlsruhe, Universität Karlsruhe, Fakultät für Informatik Karlsruhe*.
